# Supplementary material for: Embracing ligands. Synthesis, characterisation and the correlation between59Co NMR and ligand field parameters of Co(iii) complexes with a new class of nitrogen–thioether multidentate ligand
Source: Royal Society of Chemistry journal article supplement (doi:10.1039/b313189k), 2004-01-01
Supplement: b313189k.pdf [file b313189k.pdf]

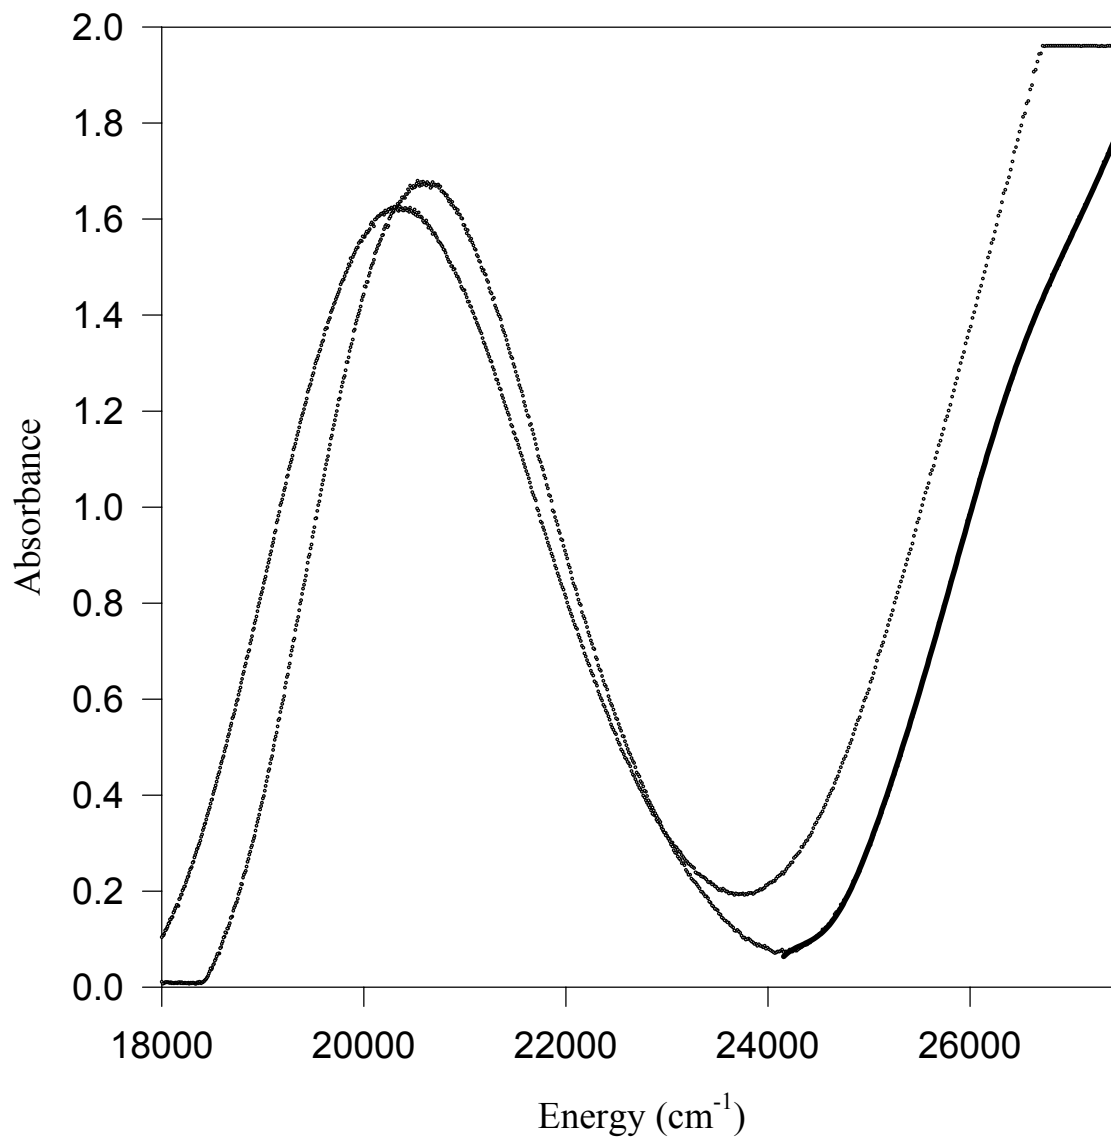

**Fig. S1(a)** Nafion film UV-visible absorption spectrum of  $[\text{Co}(\text{PrN}_4\text{S}_2\text{amp})]^{3+}$  at room temperature and 14 K - spin allowed transitions

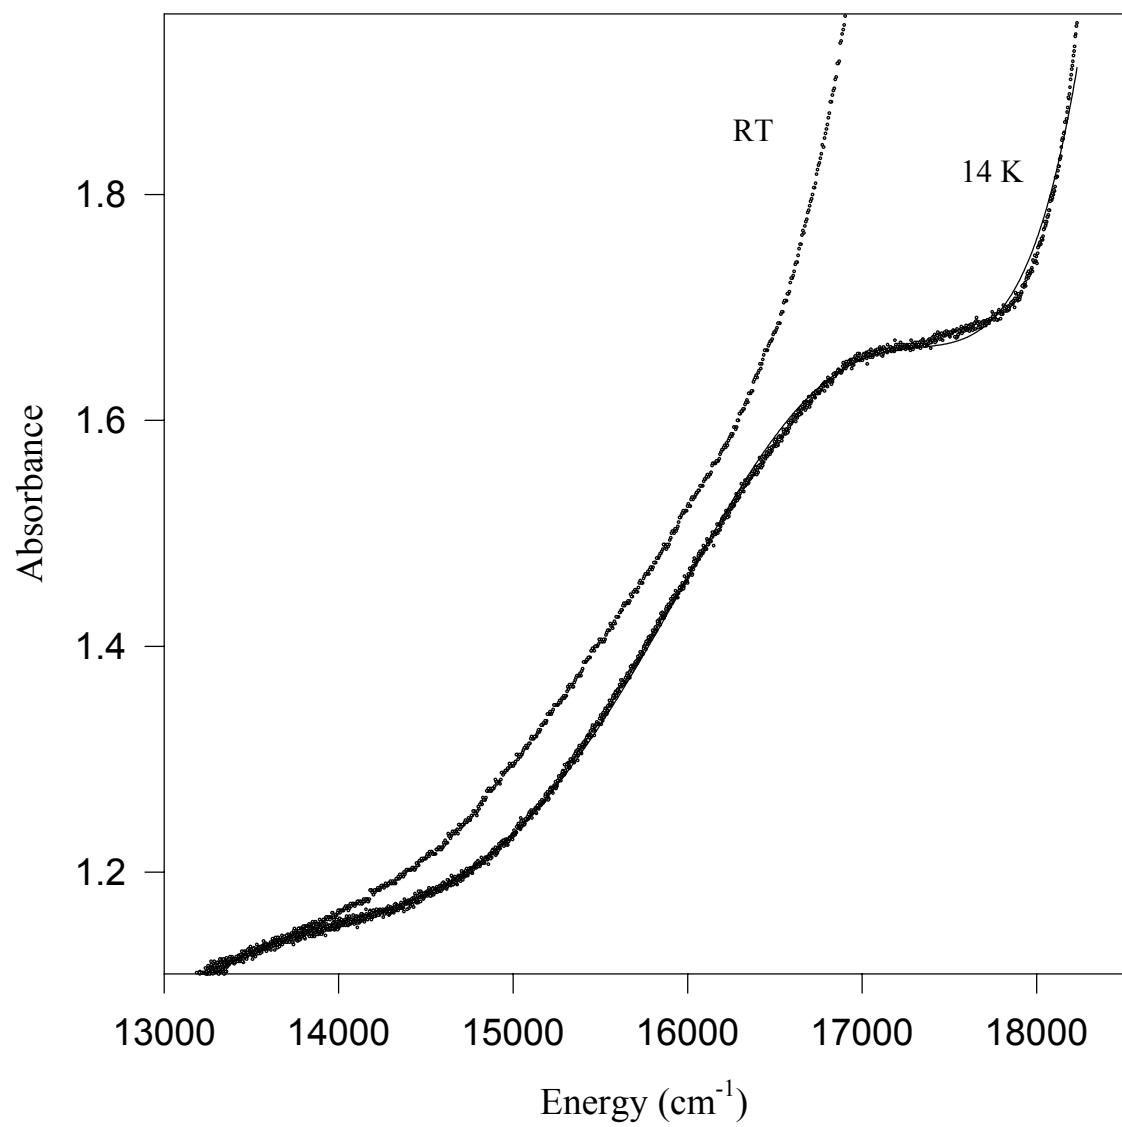

**Fig. S1(b)** Nafion film UV-visible absorption spectra of [Co(PrN<sub>4</sub>S<sub>2</sub>amp)]<sup>3+</sup> at room temperature and 14 K - spin forbidden transitions
